# Supplementary material for: Electrosynthesis and analytical characterisation of polypyrrole thin films modified with copper nanoparticles
Source: Royal Society of Chemistry journal article supplement (doi:10.1039/b009857o), 2001-01-01
Supplement: b009857o.doc [file b009857o.doc]

For ESI Service, manuscript B009857o

A)

C)

B)

Experimental (histograms) and Poissonian (full lines) distributions of the distances between first (A), second (B) and third (C) neighbouring crystals obtained from the micrograph in figure 4B. N=1.61.108 cm-2.
